# Supplementary material
Source: Research Square preprint supplement (doi:10.21203/rs.3.rs-10043002/v1)
Supplement: Supplementary file 1 [file f9019ef0232678ebfd653d59.xlsx]

## Sheet: Sheet1
Benchmark	Base Model	Fine-tuned Model	DeepSeek-V3.2
BigCodeBench	18	26	34
MATH	20	25	65
TheoremQA	18.75	21.88	18
MMLU_Pro	9.38	40.62	34.38
GPQA	10	16.67	10
SuperGPQA	17	22	27.5
BBH	85.85	86.22	67
ToMATO	6.25	12.5	3.12
CPED	15	22	20
ARC_Challenge	84.38	78.12	53.12
PIQA	80	76	60
