# Supplementary material
Source: Research Square preprint supplement (doi:10.21203/rs.3.rs-10043002/v1)

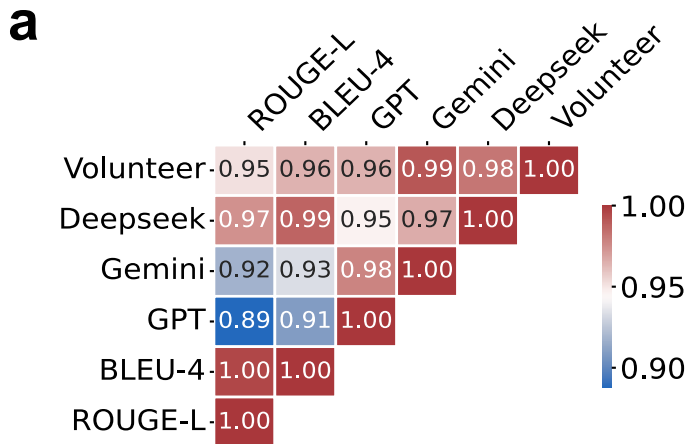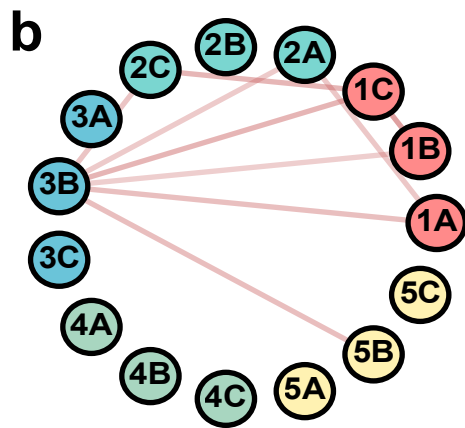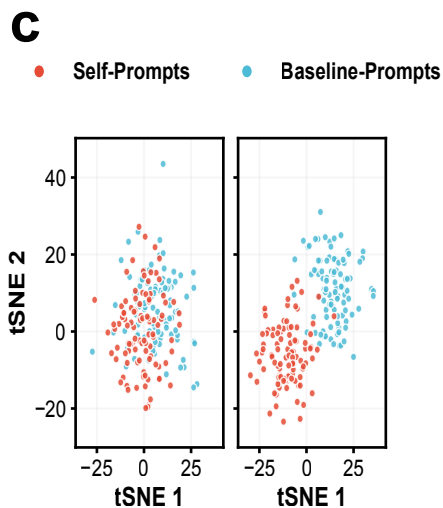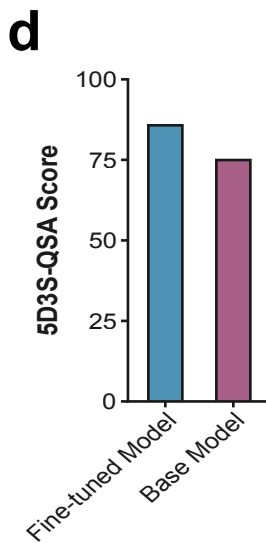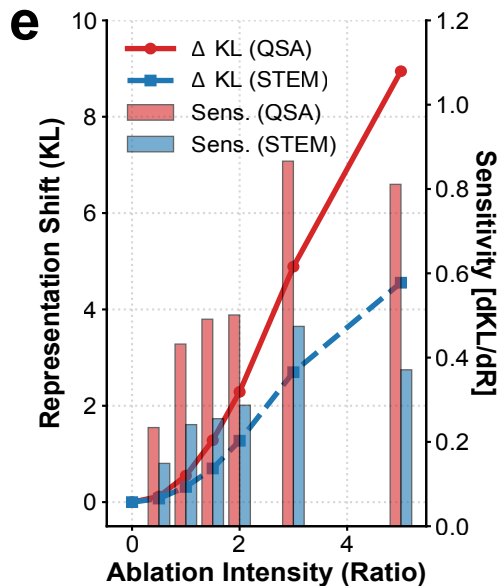

Supplement: Supplementary file 1 [file fb793f94a2f05cf4e0d743e5.pdf]
